# Supplementary material for: Nanoemulsion Composed of α-Tocopherol Succinate and Dequalinium Shows Mitochondria-Targeting and Anticancer Effects
Source: MDPI journal article supplement (doi:10.3390/antiox12020437), 2023-02-10
Supplement: s1 [file s1]

# **Nanoemulsion composed of $\alpha$ -Tocopherol succinate and Dequalinium shows mitochondria targeting and anticancer effect**

Le Thi Thuy <sup>1</sup>, Seulgi Lee <sup>2</sup>, Viet Dongquoc <sup>3</sup> and Joon Sig Choi <sup>1,\*</sup>

<sup>1</sup>Department of Biochemistry, Chungnam National University, 99 Daehak-ro,  
Yuseong-gu, Daejeon 34134, Republic of Korea

<sup>2</sup>KM Science Research Division, Korea Institute of Oriental Medicine, Yuseong-daero 1672,  
Yuseong-gu, Daejeon 34054, Republic of Korea

<sup>3</sup>Department of Materials Science and Engineering, Chungnam National University, 99 Daehak-ro,  
Yuseong-gu, Daejeon 34134, Republic of Korea

\*Correspondence: joonsig@cnu.ac.kr; Tel.: Tel: +82-42-821-7528, Fax: +82-42-822-7548

## Supporting information

### DQA and $\alpha$ -Tos encapsulation efficiency

The concentrations of DQA and  $\alpha$ -Tos in the emulsion were analyzed using an ultraviolet spectrometer (UV-vis). A calibration curve was established for each of the compounds, with DQA being analyzed at wavelengths 330 nm and 290 nm and  $\alpha$ -Tos being analyzed at wavelength 290 nm (Figure S1). The high correlation coefficients ( $R^2 = 0.9954, 0.9983$  and  $0.9950$ ) obtained from the standard curve fitting confirmed the accuracy of the results. To measure the absorbance of  $\alpha$ -Tos in the emulsion, the freeze-dried sample was first dissolved in methanol, vortexed for 1 minute, and then analyzed using UV detection. The absorbance was calculated using the equation provided:

Absorbance of  $\alpha$ -Tos<sub>290nm</sub> = Absorbance of emulsion<sub>290nm</sub> – Absorbance of DQA<sub>290nm</sub> (determined from its concentration calculated using its absorbance at 330 nm)

The encapsulation efficiency of DQA and  $\alpha$ -Tos was calculated as the following equation, respectively:

$$\text{Encapsulation efficiency (EE\%)} = \frac{\text{Amount of drugs loaded in emulsion}}{\text{Amount of the feeding drugs}} \times 100\%$$

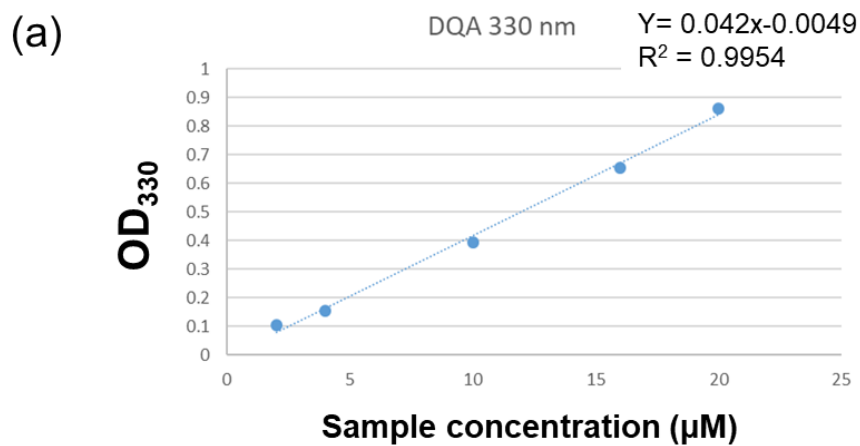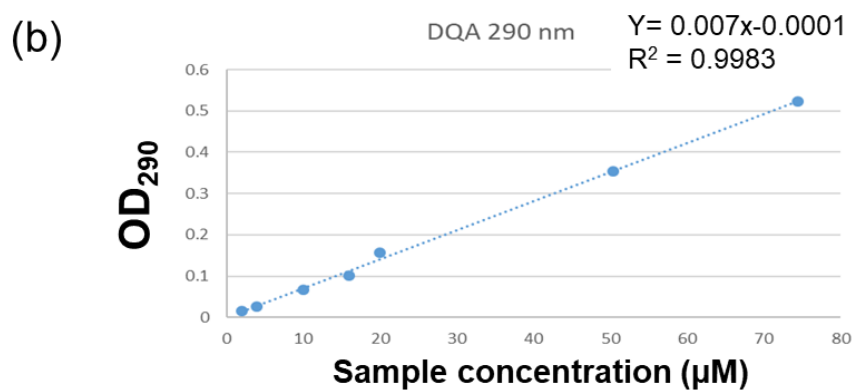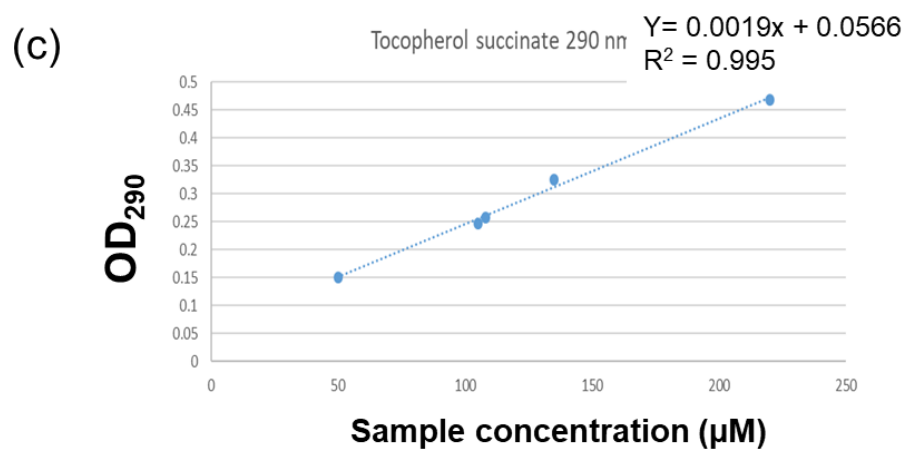

**Figure S1.** The standard curve of a) DQA at 330 nm, b) DQA at 290 nm and c)  $\alpha$ -TOS at 290 nm.

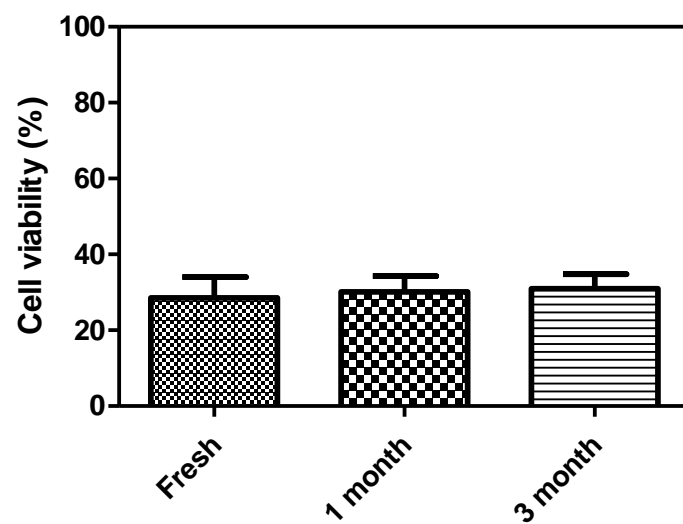

**Figure S2.** Measurement of HeLa cell viability after 24 hours of exposure to 30  $\mu$ M DTOS 5-5 emulsion stored at room temperature for the specified period.

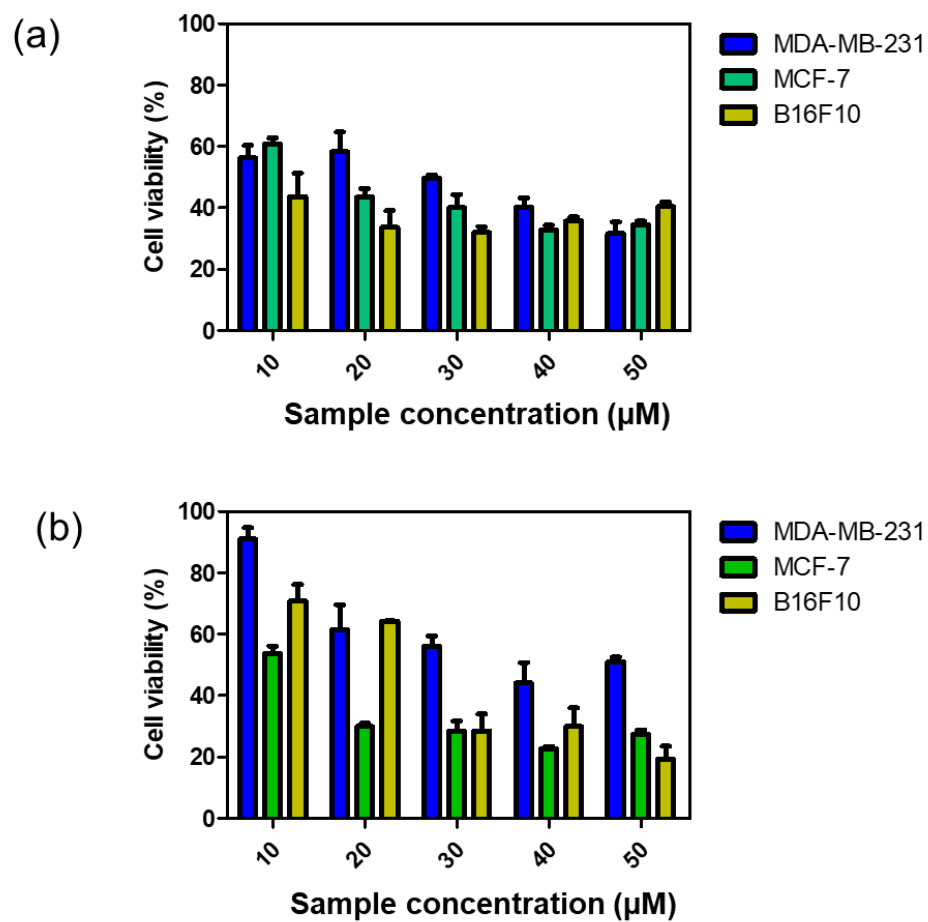

**Figure S3.** Cell viability of DTOS 5-5 emulsion at varying concentrations measured in MDA-MB-231, MCF-7, B16F10 cells at a) 24 and b) 48 h.

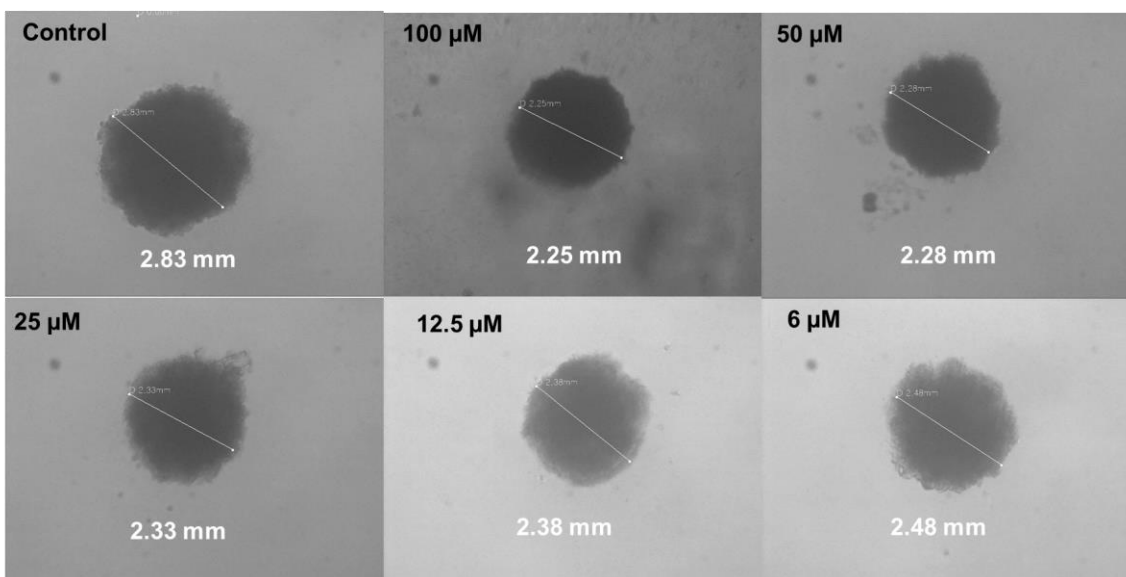

**Figure S4.** The magnification of the spheroid after treatment with DTOS emulsion on day 6.
